# Supplementary material for: Postpartum diabetes screening among low income women with gestational diabetes in Missouri 2010–2015
Source: PubMed Central journal article supplement (PMC6360751; doi:10.1186/s12889-019-6475-0), 2019-02-04
Supplement: 12889_2019_6475_MOESM1_ESM.pdf [file 12889_2019_6475_MOESM1_ESM.pdf]

Supplementary Table S1- Conditions and associated ICD9/10-CM Diagnosis or Procedure Codes

| Condition                          | ICD-9-CM Diagnosis or Procedure Code                                                                                                                                                                                                                                                                                                                                                       | ICD-10-CM-Diagnosis or Procedure Code                                                                                                                                                                                                                                                                                                                     |
|------------------------------------|--------------------------------------------------------------------------------------------------------------------------------------------------------------------------------------------------------------------------------------------------------------------------------------------------------------------------------------------------------------------------------------------|-----------------------------------------------------------------------------------------------------------------------------------------------------------------------------------------------------------------------------------------------------------------------------------------------------------------------------------------------------------|
| <b>Delivery identification</b>     |                                                                                                                                                                                                                                                                                                                                                                                            |                                                                                                                                                                                                                                                                                                                                                           |
| Any delivery                       | V27, 650<br>72xx 73xx 740-742 744 7499                                                                                                                                                                                                                                                                                                                                                     | Z37 O80 O82<br>OQ820ZZ OQ823ZZ OQ824ZZ OQ830ZZ<br>OQ833ZZ OQ834ZZ OU7C7ZZ OW8NXZZ<br>10900ZC 10903ZC 10904ZC 10907ZA<br>10907ZC 10908ZA 10908ZC 10A07ZZ<br>10A08ZZ 10D00Z0 10D00Z1 10D00Z2<br>10D07Z3 10D07Z4 10D07Z5 10D07Z6<br>10D07Z7 10D07Z8 10E0XZZ 10J07ZZ<br>10S07ZZ 10S0XZZ 3E030VJ 3E033VJ<br>3E040VJ 3E043VJ 3E053VJ 3E060VJ<br>3E063VJ 3E0P7GC |
| <b>Diabetes Identification</b>     |                                                                                                                                                                                                                                                                                                                                                                                            |                                                                                                                                                                                                                                                                                                                                                           |
| Gestational diabetes               | 6488 6480 (only if noted after 6488)                                                                                                                                                                                                                                                                                                                                                       | O244                                                                                                                                                                                                                                                                                                                                                      |
| Pre-existing diabetes mellitus     | 249 250 6480 (if not after 6488)                                                                                                                                                                                                                                                                                                                                                           | O240 O241 O243 O248 O249 E08 E09<br>E10 E11 E13                                                                                                                                                                                                                                                                                                           |
| Type 2 diabetes                    | 250x0 250x2                                                                                                                                                                                                                                                                                                                                                                                | E11                                                                                                                                                                                                                                                                                                                                                       |
| <b>Comorbidities</b>               |                                                                                                                                                                                                                                                                                                                                                                                            |                                                                                                                                                                                                                                                                                                                                                           |
| Mild pre-eclampsia                 | 6424                                                                                                                                                                                                                                                                                                                                                                                       | O11 O140                                                                                                                                                                                                                                                                                                                                                  |
| Severe pre-eclampsia               | 64251 64252 64253 64254 64261 64262<br>64263 64264                                                                                                                                                                                                                                                                                                                                         | O141 O142 O150 O151 O152 O159                                                                                                                                                                                                                                                                                                                             |
| Pre-existing hypertension          | 64200 64201 64202 64203 64204 64211<br>64212 64213 64214 64221 64222 64223<br>64224 64271 64272 64273 64274 4010<br>4011 4012 4013 4014 4015 4016 4017<br>4018 4019 4020 4021 4022 4023 4024<br>4025 4026 4027 4028 4029 4030 4031<br>4032 4033 4034 4035 4036 4037 4038<br>4039 4040 4041 4042 4043 4044 4045<br>4046 4047 4048 4049 4050 4051 4052<br>4053 4054 4055 4056 4057 4058 4059 | I10 I11 I12 I13 I15 O10 O11                                                                                                                                                                                                                                                                                                                               |
| Transient Gestational hypertension | 64230 64231 64232 64233 64234                                                                                                                                                                                                                                                                                                                                                              | O161 O162 O163 O164 O165 O169 O131<br>O132 O133 O134 O135 O139                                                                                                                                                                                                                                                                                            |
| Depression                         | 29620 29621 29622 29623 29624 29625<br>29630 29631 29632 29633 29634 29635<br>2965 2966 29682 29690 3004 3090 3091<br>311<br>30928                                                                                                                                                                                                                                                         | Z373 Z3760 Z3761 Z3762 Z3763 Z3764<br>Z3769 Z377 F320 F321 F322 F323 F324<br>F325 F328 F329 F330 F331 F332 F333<br>F338 F339 F341 F348 F349 F412 F3131<br>F3132 F314 F315 F316 F348 F349 F380<br>F381 F388 F39 F99                                                                                                                                        |
| Alcohol abuse                      | 291 303 3050                                                                                                                                                                                                                                                                                                                                                                               | F10                                                                                                                                                                                                                                                                                                                                                       |
| Drug abuse                         | 304 3052 3053 3054 3055 3056 3057<br>3058 3059 6483                                                                                                                                                                                                                                                                                                                                        | F11 F12 F13 F14 F15 F16 F18 F19                                                                                                                                                                                                                                                                                                                           |
| Asthma                             | 493                                                                                                                                                                                                                                                                                                                                                                                        | J44 J45                                                                                                                                                                                                                                                                                                                                                   |
| Chronic ischemic heart disease     | 412 413 414                                                                                                                                                                                                                                                                                                                                                                                | I20 I25                                                                                                                                                                                                                                                                                                                                                   |
| Congenital heart disease           | 7450 7474 6485                                                                                                                                                                                                                                                                                                                                                                             | Q20 Q21 Q22 Q23 Q24 Q25 Q26 O994                                                                                                                                                                                                                                                                                                                          |
| Congestive heart failure           | 42822 42823 42832 42833 42842 42843                                                                                                                                                                                                                                                                                                                                                        | I5022 I5023 I5032 I5033 I5042 I5043                                                                                                                                                                                                                                                                                                                       |
| HIV                                | 042 V08                                                                                                                                                                                                                                                                                                                                                                                    | B20 B24 O987 Z21                                                                                                                                                                                                                                                                                                                                          |
| Pulmonary hypertension             | 4160 4168 4169                                                                                                                                                                                                                                                                                                                                                                             | I270 I272 I278 I279                                                                                                                                                                                                                                                                                                                                       |
| Renal disease                      | 581 582 583 585 587 588 6462                                                                                                                                                                                                                                                                                                                                                               | N022 N03 N04 N05 N08 N171 N172 N18<br>N25 O2683                                                                                                                                                                                                                                                                                                           |

|                              |                                                                            |                                                                                                                                                                                                                                            |
|------------------------------|----------------------------------------------------------------------------|--------------------------------------------------------------------------------------------------------------------------------------------------------------------------------------------------------------------------------------------|
| Sickle-cell disease          | 2824 2826                                                                  | D56 D57                                                                                                                                                                                                                                    |
| Systemic lupus erythematosus | 7100                                                                       | M32                                                                                                                                                                                                                                        |
| Valve disease                | 394 395 396 397 424                                                        | I05 I06 I07 I08 I09 I34 I35 I36 I37 I38 I39                                                                                                                                                                                                |
| Infant characteristics       |                                                                            |                                                                                                                                                                                                                                            |
| Multiple gestation           | V272 V273 V274 V275 V276 V277<br>651                                       | Z372 Z373 Z374 Z377 Z3750 Z3751<br>Z3752 Z3753 Z3754 Z3759 Z3760 Z3761<br>Z3762 Z3763 Z3764 Z3769 O30 O31                                                                                                                                  |
| Large for gestational age    | 65660 65661 65663                                                          | O3661X0-O3661X9<br>O3662X0-O3662X9<br>O3663X0-O3663X9<br>O3660X0-O3660X9                                                                                                                                                                   |
| Small for gestational age    | 65650 65651 65653                                                          | O365110-O365119<br>O365120-O365129<br>O365130-O365139<br>O365910-O365919<br>O365920-O365929<br>O365930-O365939<br>O365190-O365199<br>O365990-O365999                                                                                       |
| Delivery complications       |                                                                            |                                                                                                                                                                                                                                            |
| Abnormal forces of labor     | 66101 66111 66121 66141 66191 66201<br>66211 66221 66231                   | O620 O621 O622 O624 O628 O629 O631<br>O639 O630 O632                                                                                                                                                                                       |
| Caesarean section            | 6542 (previous)<br>740 741 742 744 7499                                    | O3421 (previous)<br>10D00Z0 10D00Z1 10D00Z2                                                                                                                                                                                                |
| Chorioamnionitis             | 65841                                                                      | O411010- O411019<br>O411020-O411029<br>O411030-O411039<br>O411210 -O411219<br>O411220 -O411229<br>O411230- O411239<br>O411410 -O411419<br>O411420 -O411429<br>O411430 -O411439<br>O411090- O411099<br>O411290- O411299<br>O411490- O411499 |
| Cord complication            | 66301 66311 66321 66331 66341 66351<br>66361 66381 66391                   | O43121 O43122 O43123 O43129<br>O690XX0 -O690XX9<br>O691XX0 -O691XX9<br>O692XX0- O692XX9<br>O693XX0- O693XX9<br>O695XX0 -O695XX9<br>O6981X0 -O6981X9<br>O6982X0- O6982X9<br>O6989X0-O6989X9<br>O694XX0 -O694XX9<br>O699XX0- O699XX9         |
| Fetopelvic disproportion     | 65301 65311 65321 65331 65341 65351<br>65361 65371 65381 65391 66011 66021 | O331 O334XX0-O334XX9<br>O335XX0-O335XX9<br>O337 O338 O339 O651 O654 O662 O330<br>O332 O333XX0-O333XX9 O336XX0-<br>O336XX9 O338 O339 O650 O651 O652<br>O653 O654 O655 O658 O659                                                             |
| Hypotension                  | 66911 66912 66913 66914 66921 66922<br>66923 66924                         | O2650 O2651 O2652 O2653 O751                                                                                                                                                                                                               |
| Induction of labor           | 65901 65911<br>7301 7309 731 734                                           | O610 O611 O618 O619<br>0U7C7ZZ 10900ZC 10903ZC 10904ZC<br>10907ZC 10908ZC 10907ZC 10908ZC<br>3E030VJ 3E033VJ 3E040VJ 3E043VJ                                                                                                               |

|                           |                                                                |                                                                                                                                                                                                                                                                                                                        |
|---------------------------|----------------------------------------------------------------|------------------------------------------------------------------------------------------------------------------------------------------------------------------------------------------------------------------------------------------------------------------------------------------------------------------------|
|                           |                                                                | 3E050VJ 3E053VJ 3E060VJ 3E063VJ<br>3E0DXGC 3E0P7GC                                                                                                                                                                                                                                                                     |
| Infection during delivery | 6700 6701 6702 6703 6704 6705 6706<br>6707 6708 6720 65931     | O753 O8612 O864 O85                                                                                                                                                                                                                                                                                                    |
| Malpresentation           | 65201 65211 65221 65231 65241 65251<br>65261 65271 65281 65291 | O320XX0-O320XX9<br>O321XX0-O321XX9<br>O322XX0-O322XX9<br>O323XX0-O323XX9<br>O324XX0-O324XX9<br>O326XX0-O326XX9<br>O328XX0-O328XX9<br>O329XX0-O329XX9<br>O641XX0-O641XX9<br>O642XX0-O642XX9<br>O643XX0-O643XX9<br>O644XX0-O644XX9<br>O645XX0-O645XX9<br>O648XX0-O648XX9<br>O649XX1-O649XX9<br>O661 O640XX0-O640XX9 O660 |
| Obstruction of labor      | 66001 66011 66021 66031 66041 66051<br>66061 66071 66081 66091 | O640XX0-O640XX9<br>O641XX0-O641XX9<br>O642XX0-O642XX9<br>O643XX0-O643XX9<br>O644XX0-O644XX9<br>O645XX0-O645XX9<br>O648XX0-O648XX9<br>O649XX0-O649XX9 O650 O651 O652<br>O653 O654 O655 O658 O659 O660 O662<br>O663 O6640 O6641 O666 O668 O669<br>O661                                                                   |
| Placental abruption       | 64120 64121 64123                                              | O458X1 O458X2 O458X3 O4591 O4592<br>O4593 O45001 O45002 O45003 O45009<br>O45011 O45012 O45013 O45019 O45021<br>O45022 O45023 O45029 O45091 O45092<br>O45093 O45099 O458X9 O4590                                                                                                                                        |
| Placenta previa           | 6410 6411                                                      | O44                                                                                                                                                                                                                                                                                                                    |
| Post-partum hemorrhage    | 6660 6661 6662 6663 9904 9905                                  | O720 O721 O722 O723                                                                                                                                                                                                                                                                                                    |
| Preterm labor             | 64421                                                          | O6012X0-O6012X9<br>O6013X0-O6013X9<br>O6014X0-O6014X9<br>O6022X0-O6022X9<br>O6023X0-O6023X9<br>O6010X0-O6010X9<br>O6020X0-O6020X9                                                                                                                                                                                      |
| Severe laceration         | 66421 66431<br>7562                                            | O702 O703<br>0DQP0ZZ 0DQP3ZZ 0DQP4ZZ<br>0DQP7ZZ 0DQP8ZZ 0DQQ0ZZ<br>0DQQ3ZZ 0DQQ4ZZ 0DQQ7ZZ<br>0DQQ8ZZ 0DQR0ZZ 0DQR3ZZ<br>0DQR4ZZ                                                                                                                                                                                       |
| Shoulder dystocia         | 66041                                                          | O660                                                                                                                                                                                                                                                                                                                   |
| Healthcare utilization    |                                                                |                                                                                                                                                                                                                                                                                                                        |
| Post-partum care          | V24                                                            |                                                                                                                                                                                                                                                                                                                        |
| Prenatal care             | V22 V23 V28                                                    |                                                                                                                                                                                                                                                                                                                        |
