# Supplementary material for: Postpartum diabetes screening among low income women with gestational diabetes in Missouri 2010–2015
Source: PubMed Central journal article supplement (PMC6360751; doi:10.1186/s12889-019-6475-0), 2019-02-04
Supplement: 12889_2019_6475_MOESM2_ESM.pdf [file 12889_2019_6475_MOESM2_ESM.pdf]

Supplementary Table S2- Procedures, Visits, and Laboratory tests and associated CPT codes

| Condition                         | CPT Code                                                                                              | Notes                                              |
|-----------------------------------|-------------------------------------------------------------------------------------------------------|----------------------------------------------------|
| Laboratory tests                  |                                                                                                       |                                                    |
| Hemoglobin A1C                    | 83036 83037                                                                                           |                                                    |
| 50G Glucose Challenge test        | 82950                                                                                                 |                                                    |
| Fasting Glucose                   | 82947                                                                                                 |                                                    |
| Fasting, 1HR, 2HR Glucose         | 82951                                                                                                 | 2h oGTT could be billed 82951 alone or 82947+82950 |
| 3HR Glucose                       | 82952                                                                                                 | 3h oGTT is billed as 82951+82952                   |
| Any Glucose Test                  | 80047 80048 80050<br>80053 80069 82947<br>82950 82951 82952<br>82962 83036 83037                      |                                                    |
| Healthcare utilization            |                                                                                                       |                                                    |
| Certified Diabetes Educator Visit | G0108 G0109                                                                                           |                                                    |
| Registered Dietician Visit        | 97802-97804 G0270<br>G0271                                                                            |                                                    |
| Office visit                      | 99201-99205 99211-<br>99215                                                                           |                                                    |
| Delivery identification           |                                                                                                       |                                                    |
| Delivery                          | 59400 59409 59410<br>59412 59414 59510<br>59514 59515 59525<br>59610 59612 59614<br>59618 59620 59622 | incorporates bundled prenatal and postpartum care  |
| Surgical pathology examination    | 88300 88307                                                                                           | of placenta                                        |
| Anesthesia                        | 01960 01961 01968                                                                                     |                                                    |
| Epidural                          | 01967                                                                                                 |                                                    |
